# Supplementary material for: Origin of metallic behavior in NiCo2O4 ferrimagnet
Source: PubMed Central journal article supplement (PMC4606736; doi:10.1038/srep15201), 2015-10-15
Supplement: srep15201-s1.pdf [file srep15201-s1.pdf]

## Supplementary Information

### Origin of Ferri-metallic behavior in $\text{NiCo}_2\text{O}_4$

Yugandhar Bitla<sup>†</sup>, Yi-Ying Chin<sup>‡</sup>, Jheng-Cyuan Lin<sup>§</sup>, Chien Nguyen Van<sup>†</sup>, Ruirui Liu<sup>||</sup>, Yuanmin Zhu<sup>||</sup>, Heng-Jui Liu<sup>†</sup>, Qian Zhan<sup>||</sup>, Hong-Ji Lin<sup>‡</sup>, Chien-Te Chen<sup>‡</sup>, Ying-Hao Chu<sup>†,§</sup>, and Qing He<sup>#</sup>

<sup>†</sup>Department of Materials Science and Engineering, National Chiao Tung University, Hsinchu, 300, Taiwan

<sup>‡</sup>National Synchrotron Radiation Research Center, Hsinchu 300, Taiwan

<sup>§</sup>Institute of Physics, Academia Sinica, Taipei 105, Taiwan

<sup>||</sup>Department of Material Physics and Chemistry, University of Science and Technology Beijing, Beijing 100083, China

<sup>#</sup> Department of Physics, Durham University, Durham DH1 3LE, United Kingdom

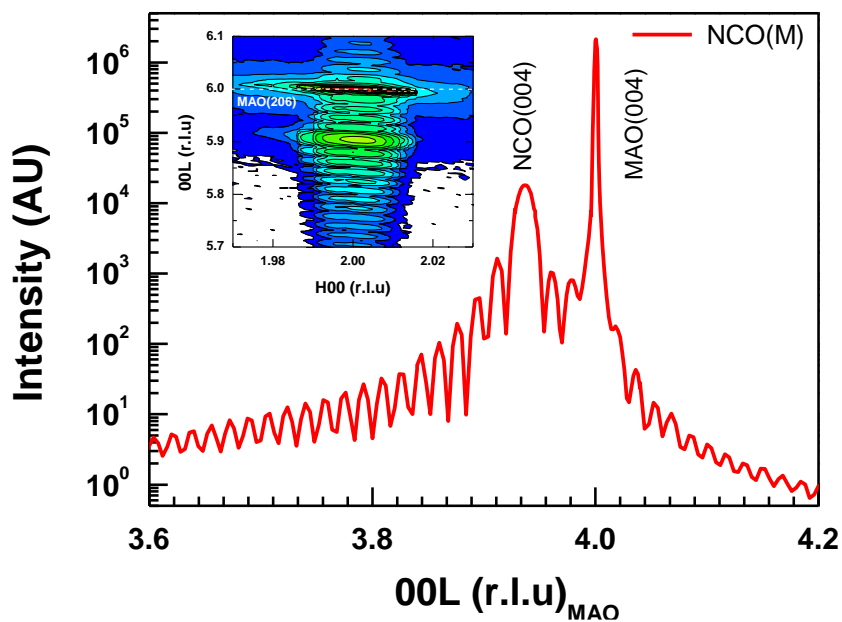

**Figure S1.** Room temperature x-ray diffractogram of metallic  $\text{NiCo}_2\text{O}_4$  film grown on  $\text{MgAl}_2\text{O}_4(100)$  substrate. Corresponding Reciprocal Space Map around the (206) reflection is shown in the inset.

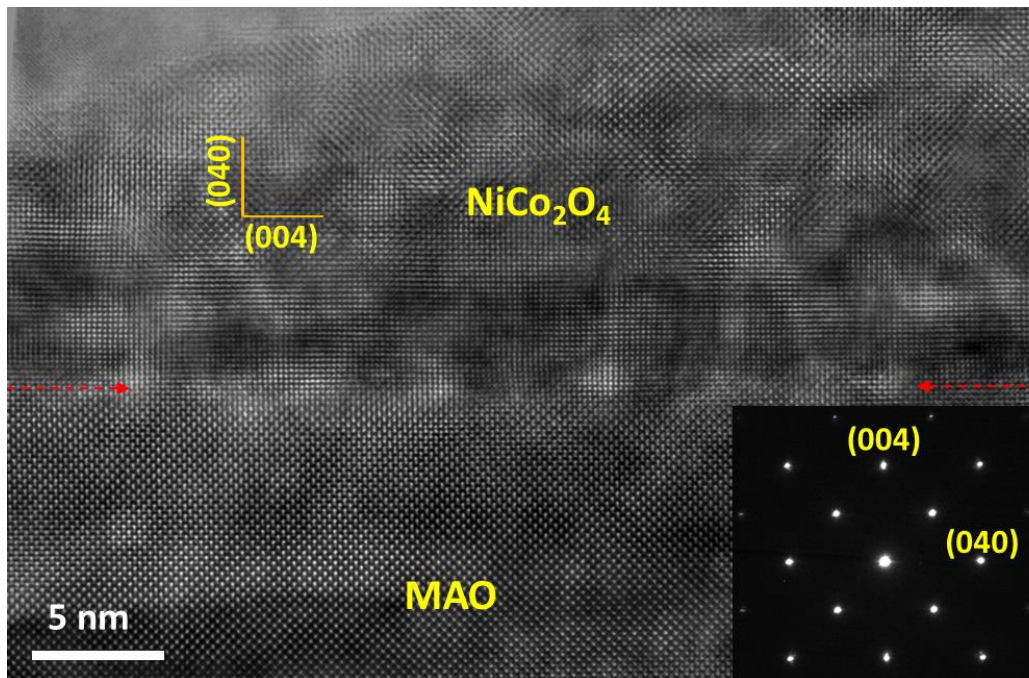

**Figure S2.** Cross-sectional HRTEM image for the NiCo<sub>2</sub>O<sub>4</sub> (NCO(M)) films grown on MgAl<sub>2</sub>O<sub>4</sub> substrate. The corresponding selected area diffraction patterns of the NCO films and MAO substrate along the [100] zone axis.
